# Supplementary material for: Fusaripyridines A and B; Highly Oxygenated Antimicrobial Alkaloid Dimers Featuring an Unprecedented 1,4-Bis(2-hydroxy-1,2-dihydropyridin-2-yl)butane-2,3-dione Core from the Marine Fungus Fusarium sp. LY019
Source: MDPI journal article supplement (doi:10.3390/md19090505), 2021-09-06

## Supporting Information

|                                                                                                        | Page |
|--------------------------------------------------------------------------------------------------------|------|
| <b>Figure S1.</b> HRESIMS spectrum of fusaripyridine A ( <b>1</b> ) .....                              | 2    |
| <b>Figure S2.</b> 600 MHz $^1\text{H}$ NMR spectrum of fusaripyridine A ( <b>1</b> ) .....             | 3    |
| <b>Figure S3.</b> 150 MHz $^{13}\text{C}$ NMR spectrum of fusaripyridine A ( <b>1</b> ) .....          | 4    |
| <b>Figure S4.</b> $^1\text{H}$ - $^1\text{H}$ COSY spectrum of fusaripyridine A ( <b>1</b> ) .....     | 5    |
| <b>Figure S5.</b> Multiplicity-edited HSQC spectrum of fusaripyridine A ( <b>1</b> ) .....             | 6    |
| <b>Figure S6.</b> $^1\text{H}$ - $^{13}\text{C}$ HMBC spectrum of fusaripyridine A ( <b>1</b> ) .....  | 7    |
| <b>Figure S7.</b> $^1\text{H}$ - $^1\text{H}$ NOESY spectrum of fusaripyridine A ( <b>1</b> ) .....    | 8    |
| <b>Figure S8.</b> HRESIMS spectrum of fusaripyridine B ( <b>2</b> ) .....                              | 9    |
| <b>Figure S9.</b> 600 MHz $^1\text{H}$ NMR spectrum of fusaripyridine B ( <b>2</b> ) .....             | 10   |
| <b>Figure S10.</b> 150 MHz $^{13}\text{C}$ NMR spectrum of fusaripyridine B ( <b>2</b> ) .....         | 11   |
| <b>Figure S11.</b> $^1\text{H}$ - $^1\text{H}$ COSY spectrum of fusaripyridine B ( <b>2</b> ) .....    | 12   |
| <b>Figure S12.</b> Multiplicity-edited HSQC spectrum of fusaripyridine B ( <b>2</b> ) .....            | 13   |
| <b>Figure S13.</b> $^1\text{H}$ - $^{13}\text{C}$ HMBC spectrum of fusaripyridine B ( <b>2</b> ) ..... | 14   |
| <b>Figure S14.</b> $^1\text{H}$ - $^1\text{H}$ NOESY spectrum of fusaripyridine B ( <b>2</b> ) .....   | 15   |

**Figure S1.** HRESIMS spectrum of fusaripyridine A (**1**).

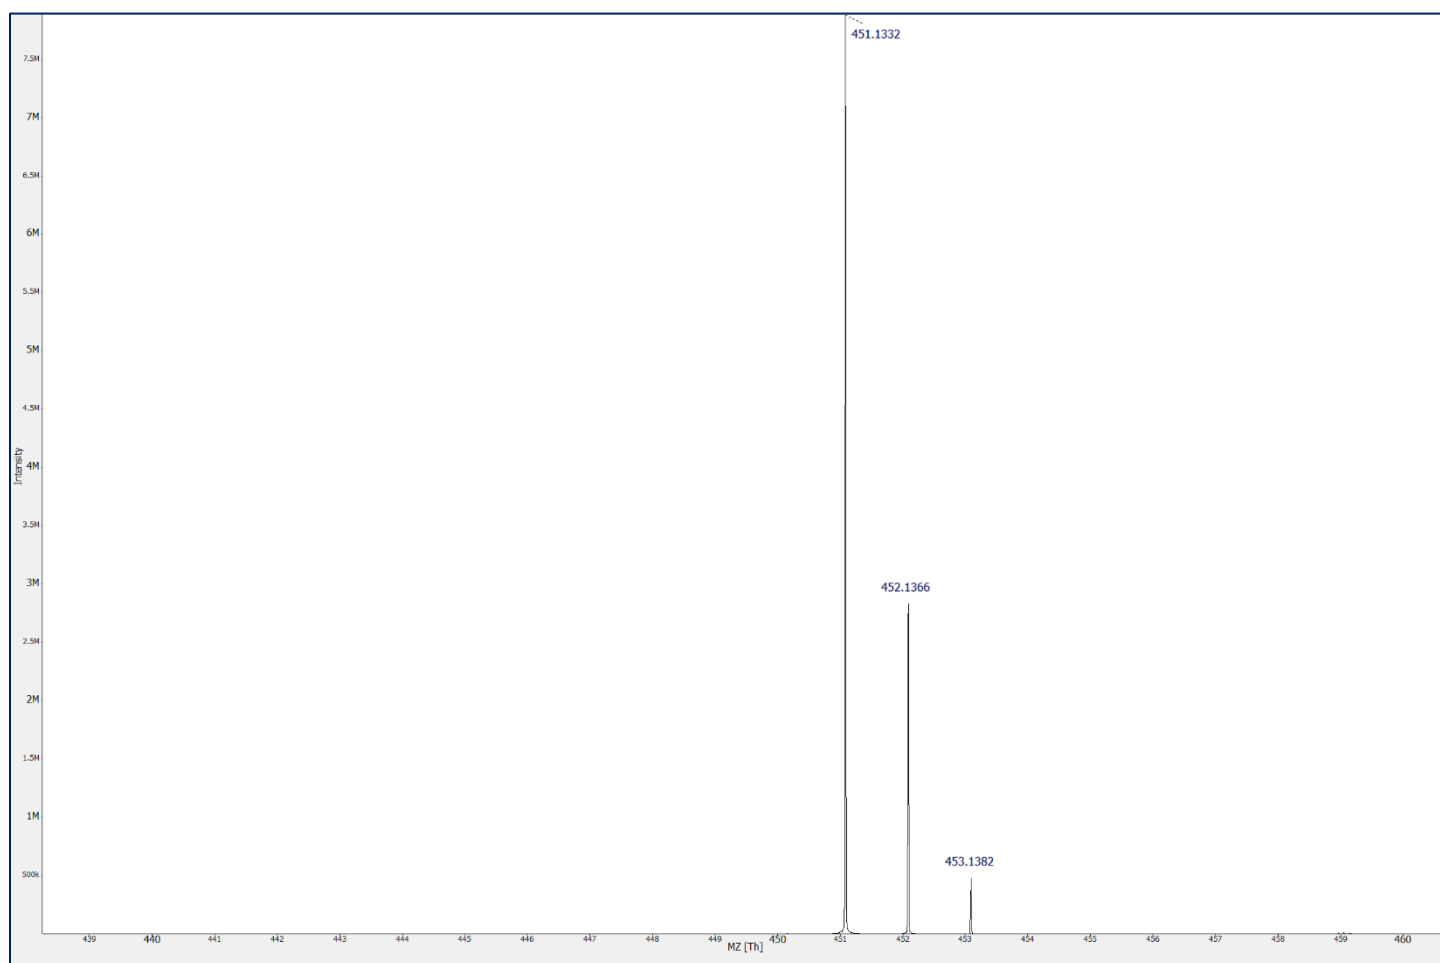

**Figure S2.** 600 MHz  $^1\text{H}$  NMR spectrum of fusaripyridine A (**1**) ( $\text{CD}_3\text{OD}$ ).

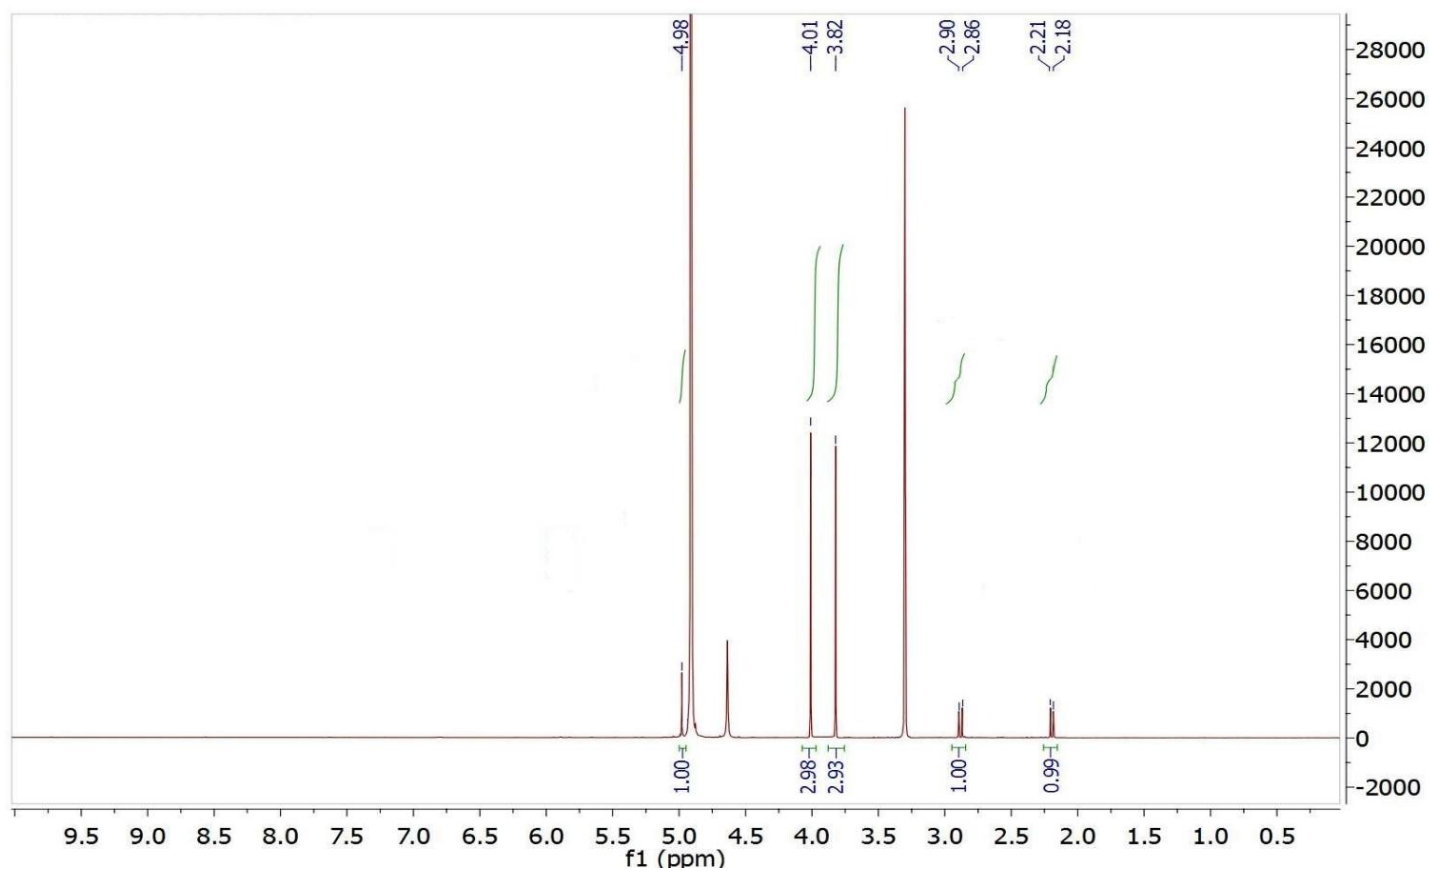

**Figure S3.** 150 MHz  $^{13}\text{C}$  NMR spectrum of fusaripyridine A (**1**) ( $\text{CD}_3\text{OD}$ ).

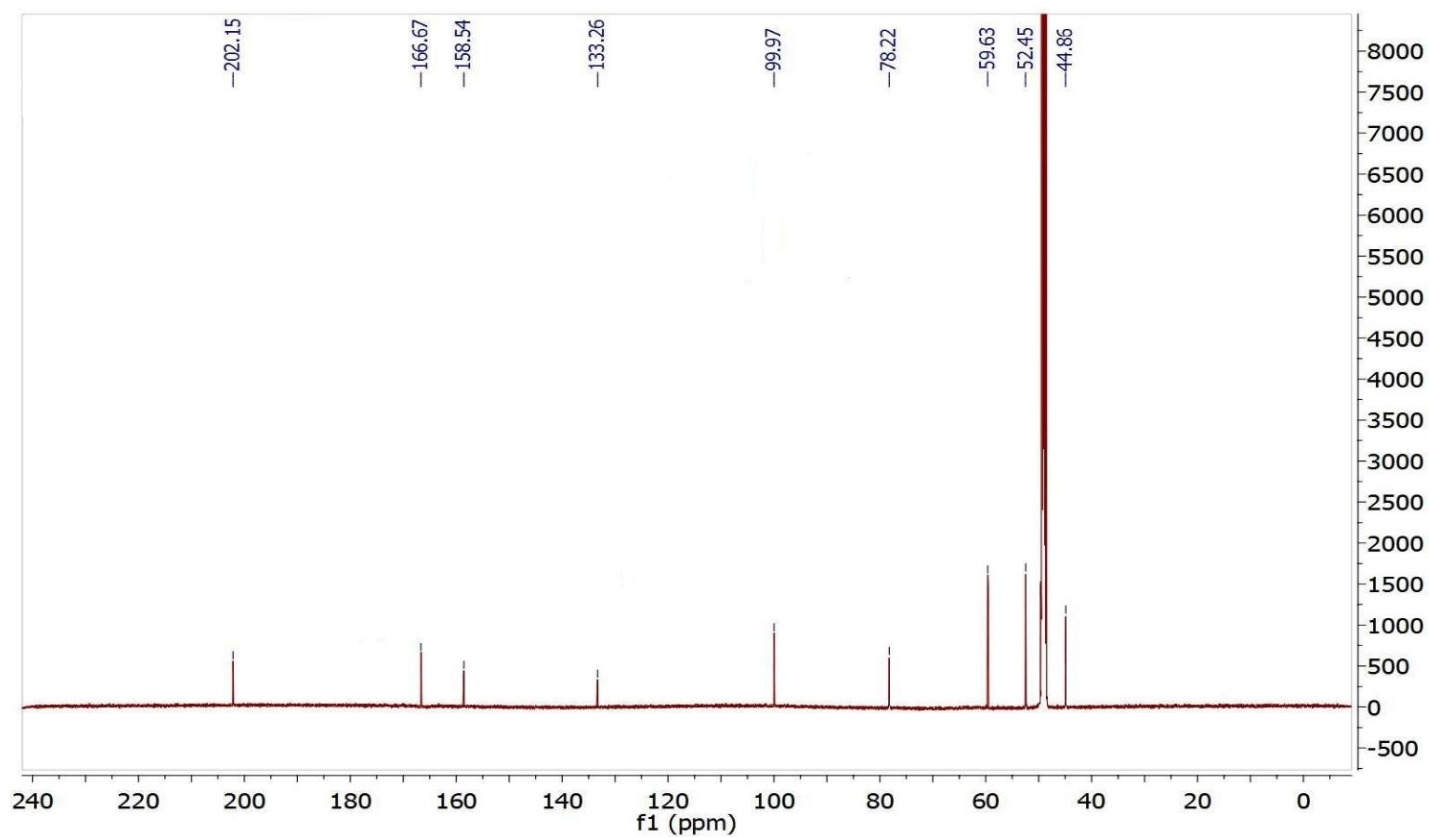

**Figure S4.**  $^1\text{H}$ - $^1\text{H}$  COSY spectrum of fusaripyridine A (**1**) ( $\text{CD}_3\text{OD}$ ).

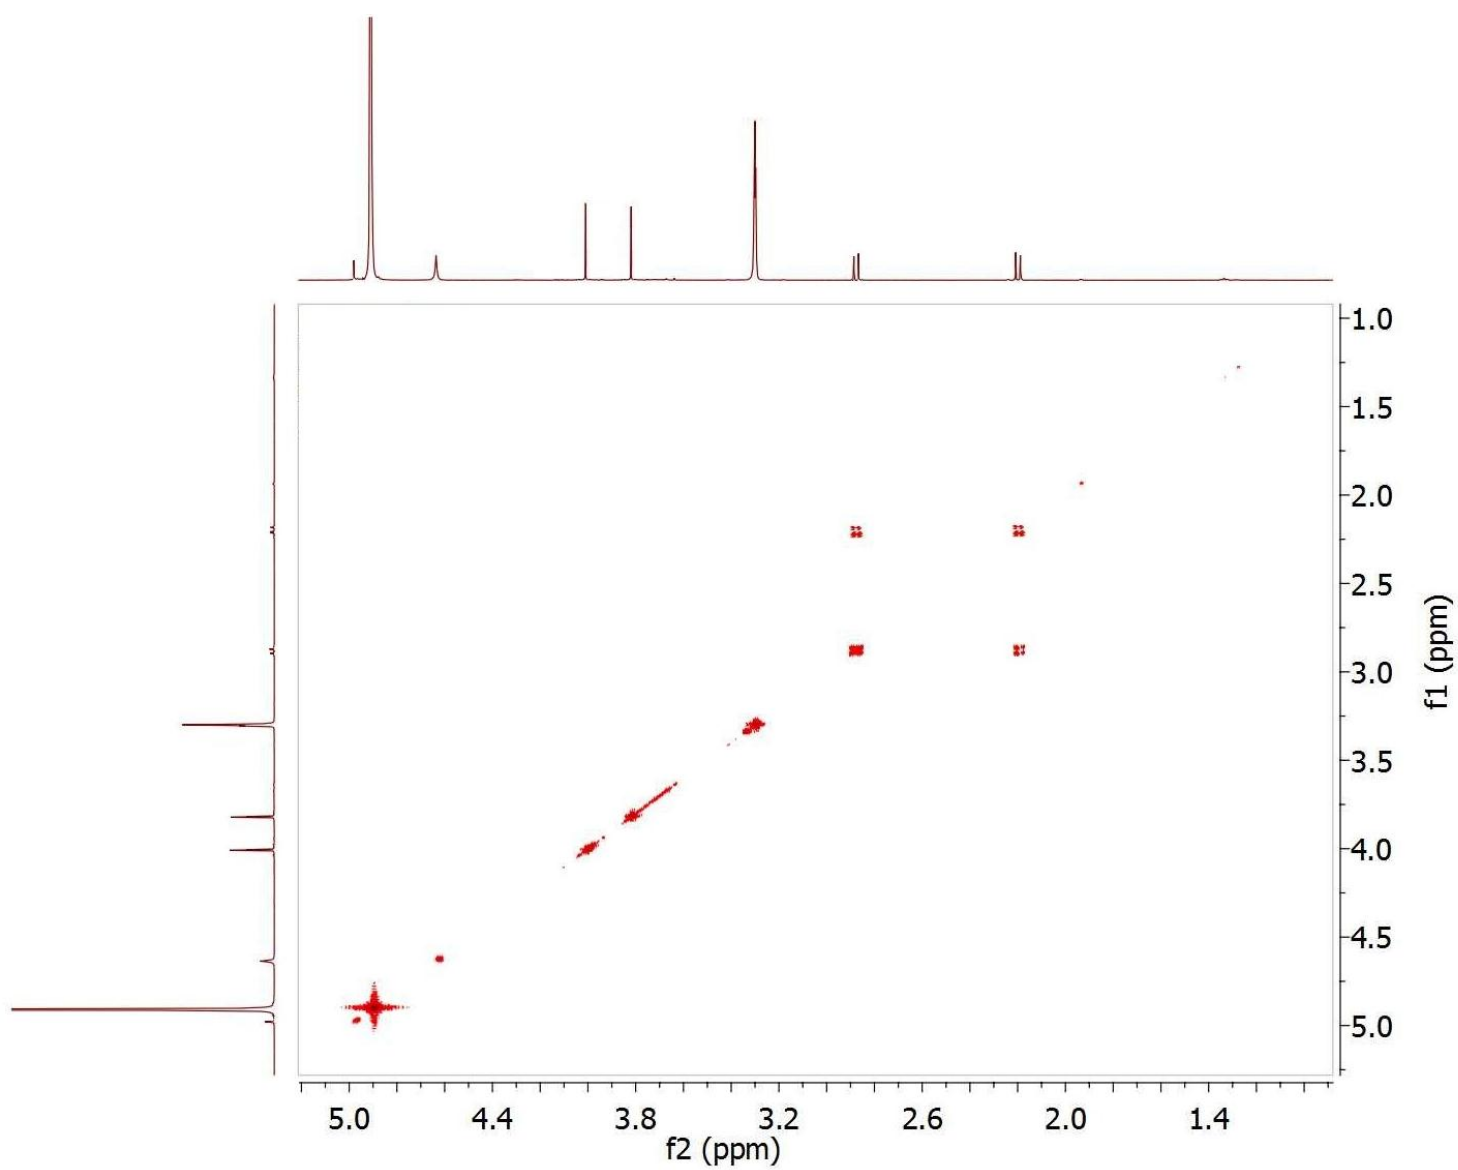

**Figure S5.** Multiplicity-edited HSQC spectrum of fusaripyridine A (**1**) (CD<sub>3</sub>OD).

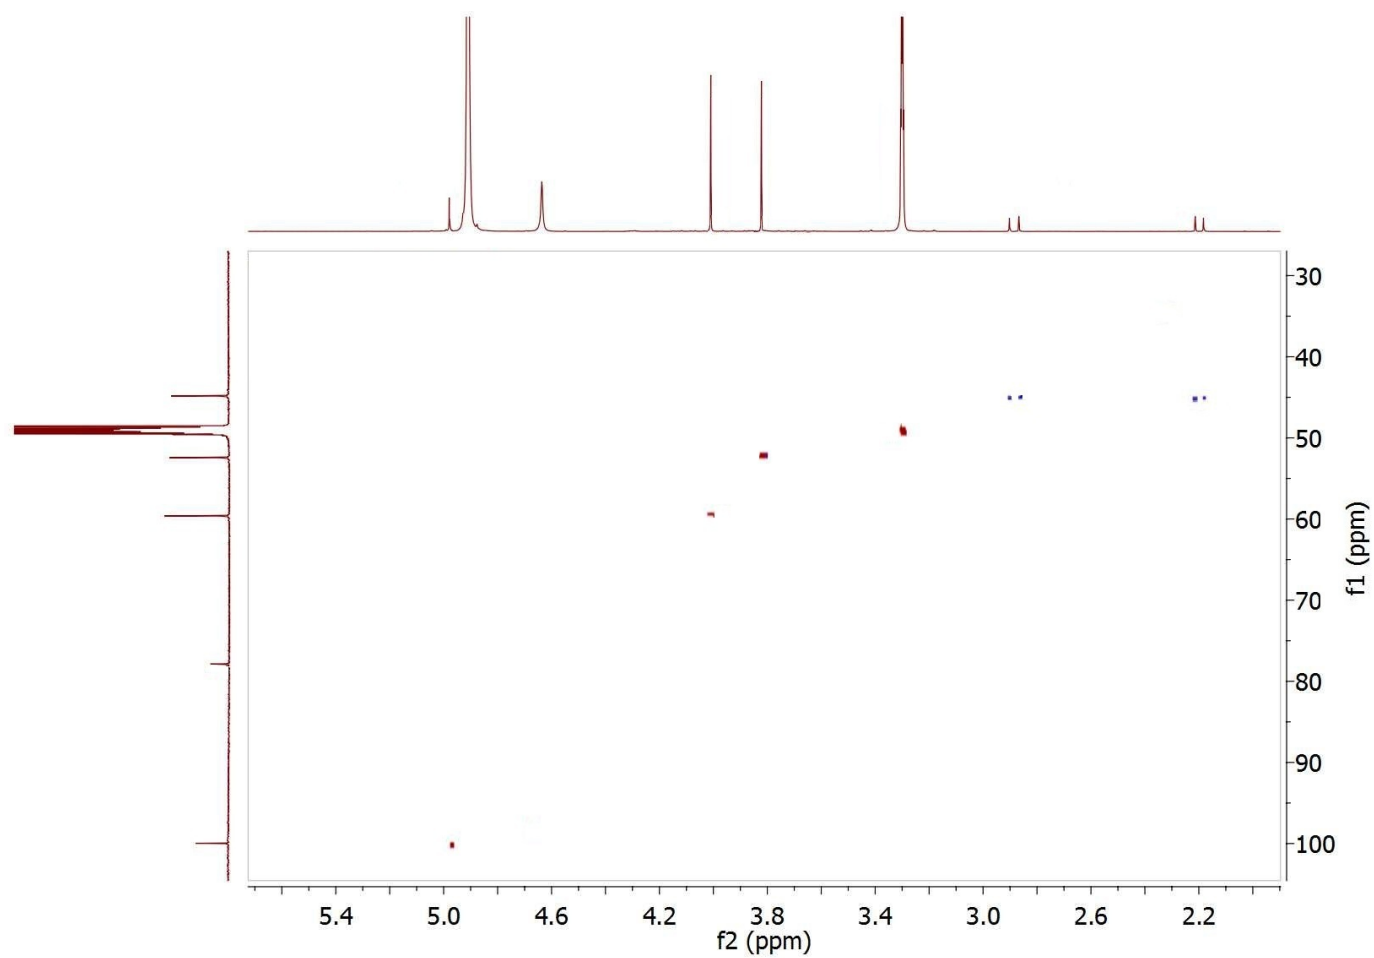

**Figure S6.**  $^1\text{H}$ - $^{13}\text{C}$  HMBC spectrum of fusaripyridine A (**1**) ( $\text{CD}_3\text{OD}$ ).

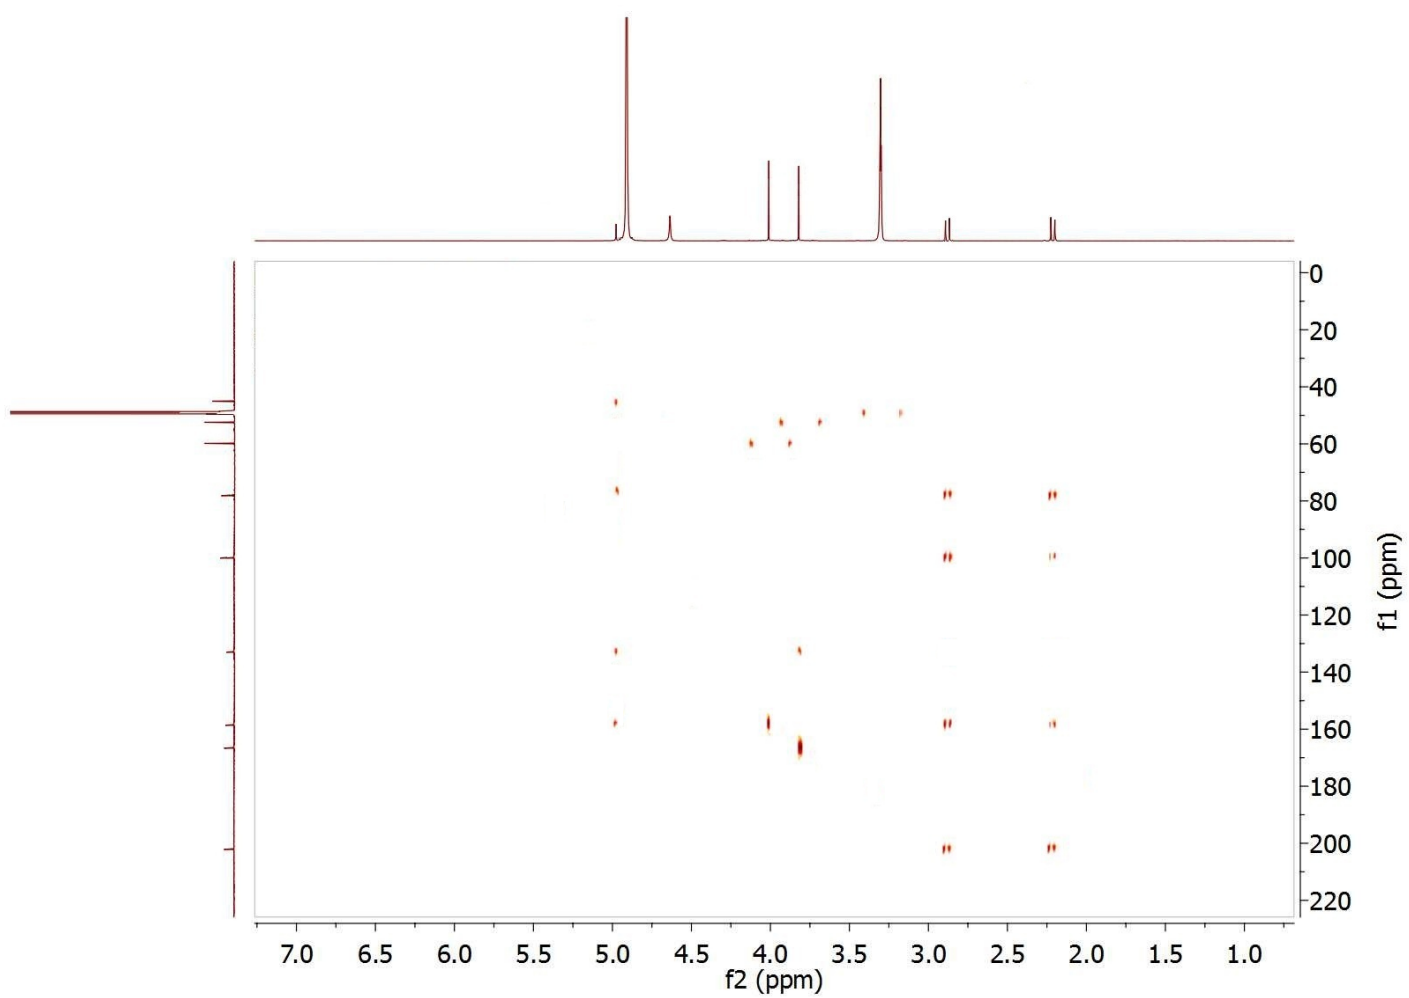

**Figure S7.**  $^1\text{H}$ - $^1\text{H}$  NOESY spectrum of fusaripyridine A (**1**) ( $\text{CD}_3\text{OD}$ ).

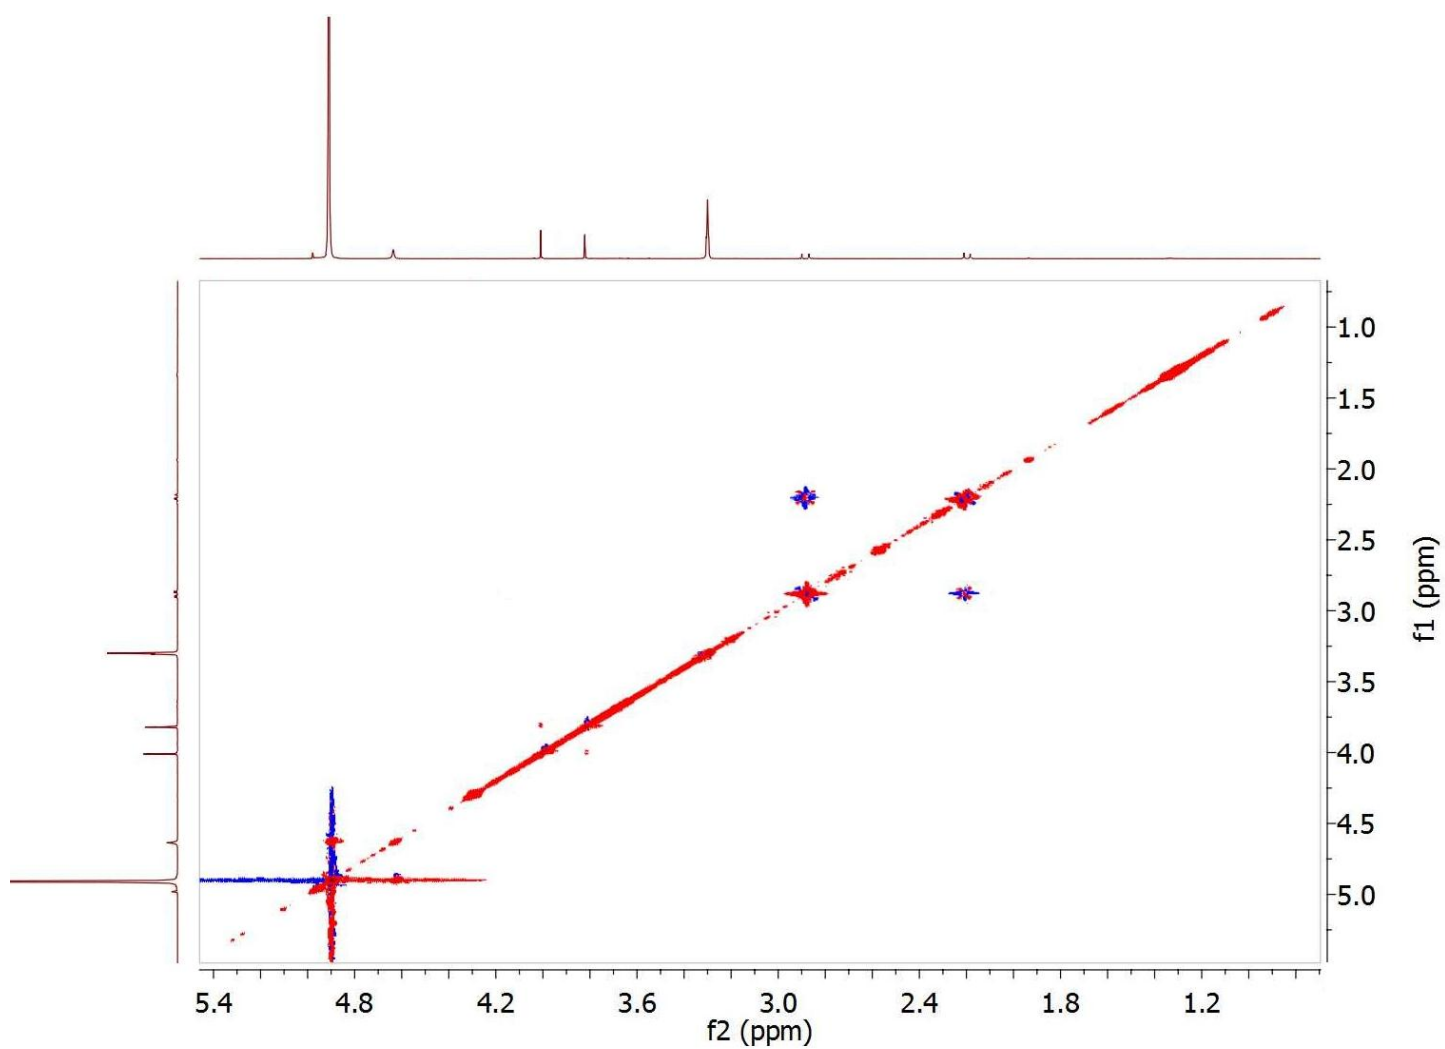



**Figure S8.** HRESIMS spectrum of fusaripyridine B (**2**).

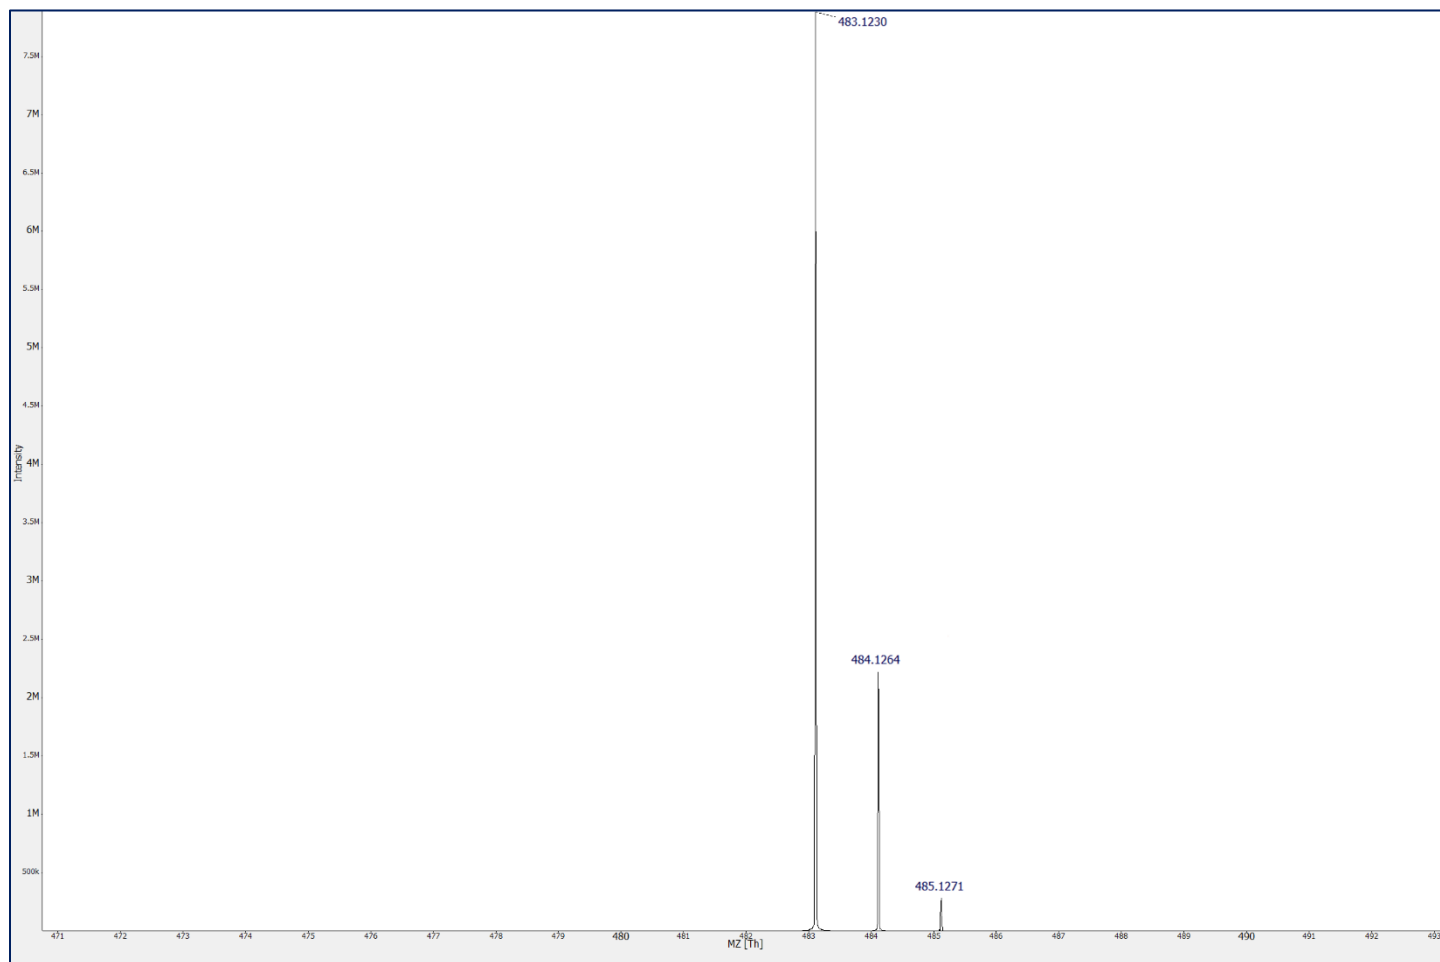

**Figure S9.** 600 MHz  $^1\text{H}$  NMR spectrum of fusaripyridine B (**2**) ( $\text{CD}_3\text{OD}$ ).

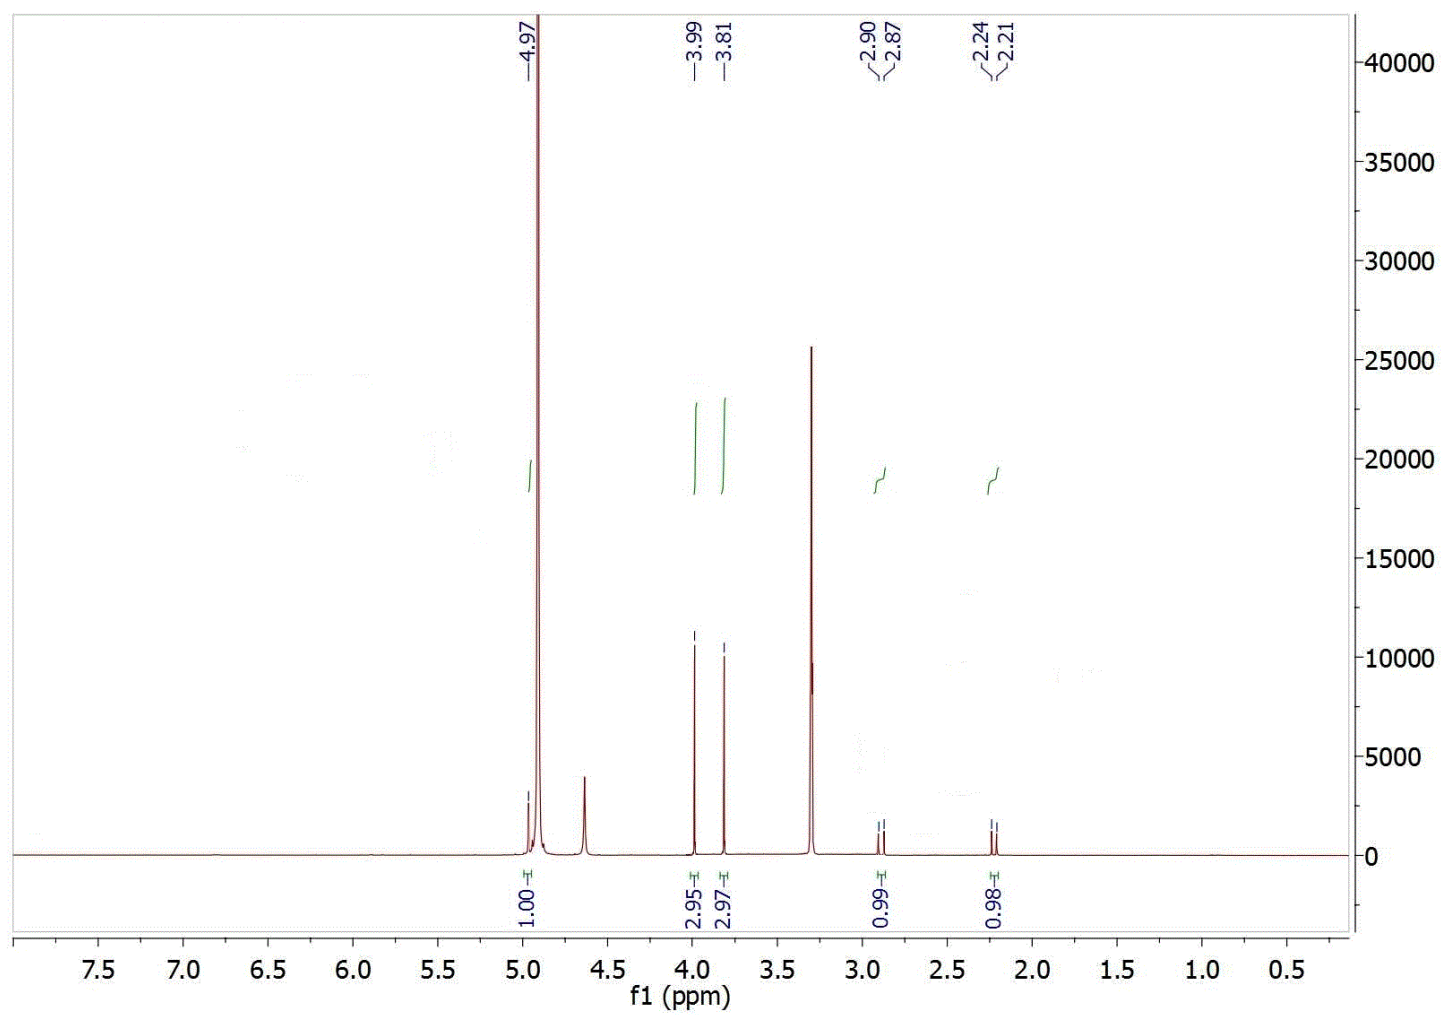

**Figure S10.** 150 MHz  $^{13}\text{C}$  NMR spectrum of fusaripyridine B (**2**) ( $\text{CD}_3\text{OD}$ ).

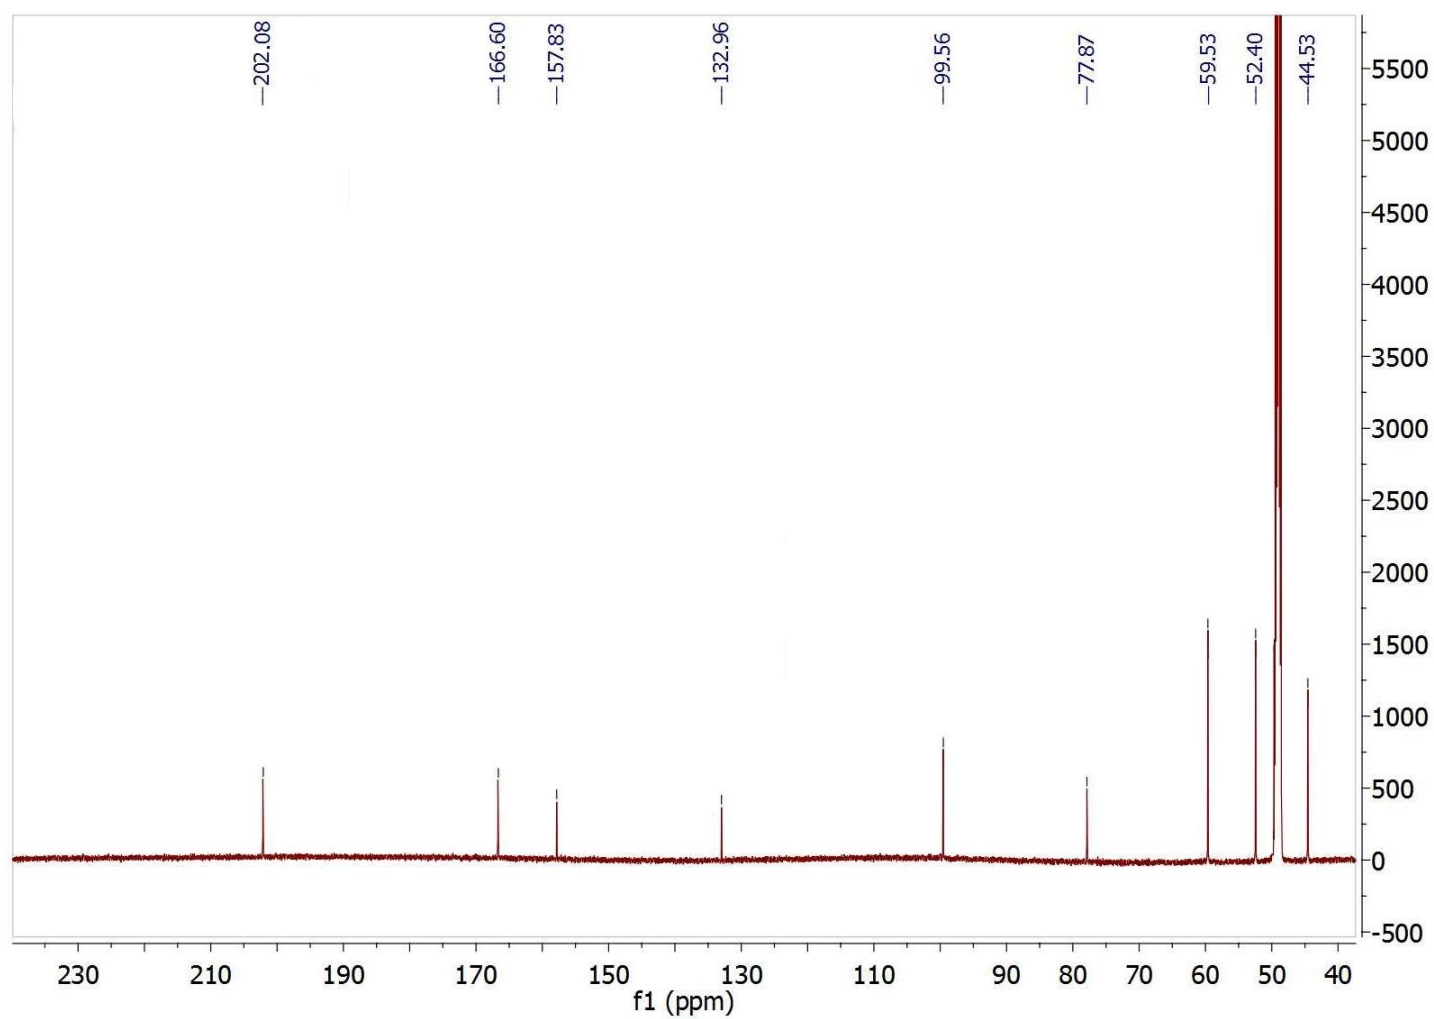

**Figure S11.**  $^1\text{H}$ - $^1\text{H}$  COSY spectrum of fusaripyridine B (**2**) ( $\text{CD}_3\text{OD}$ ).

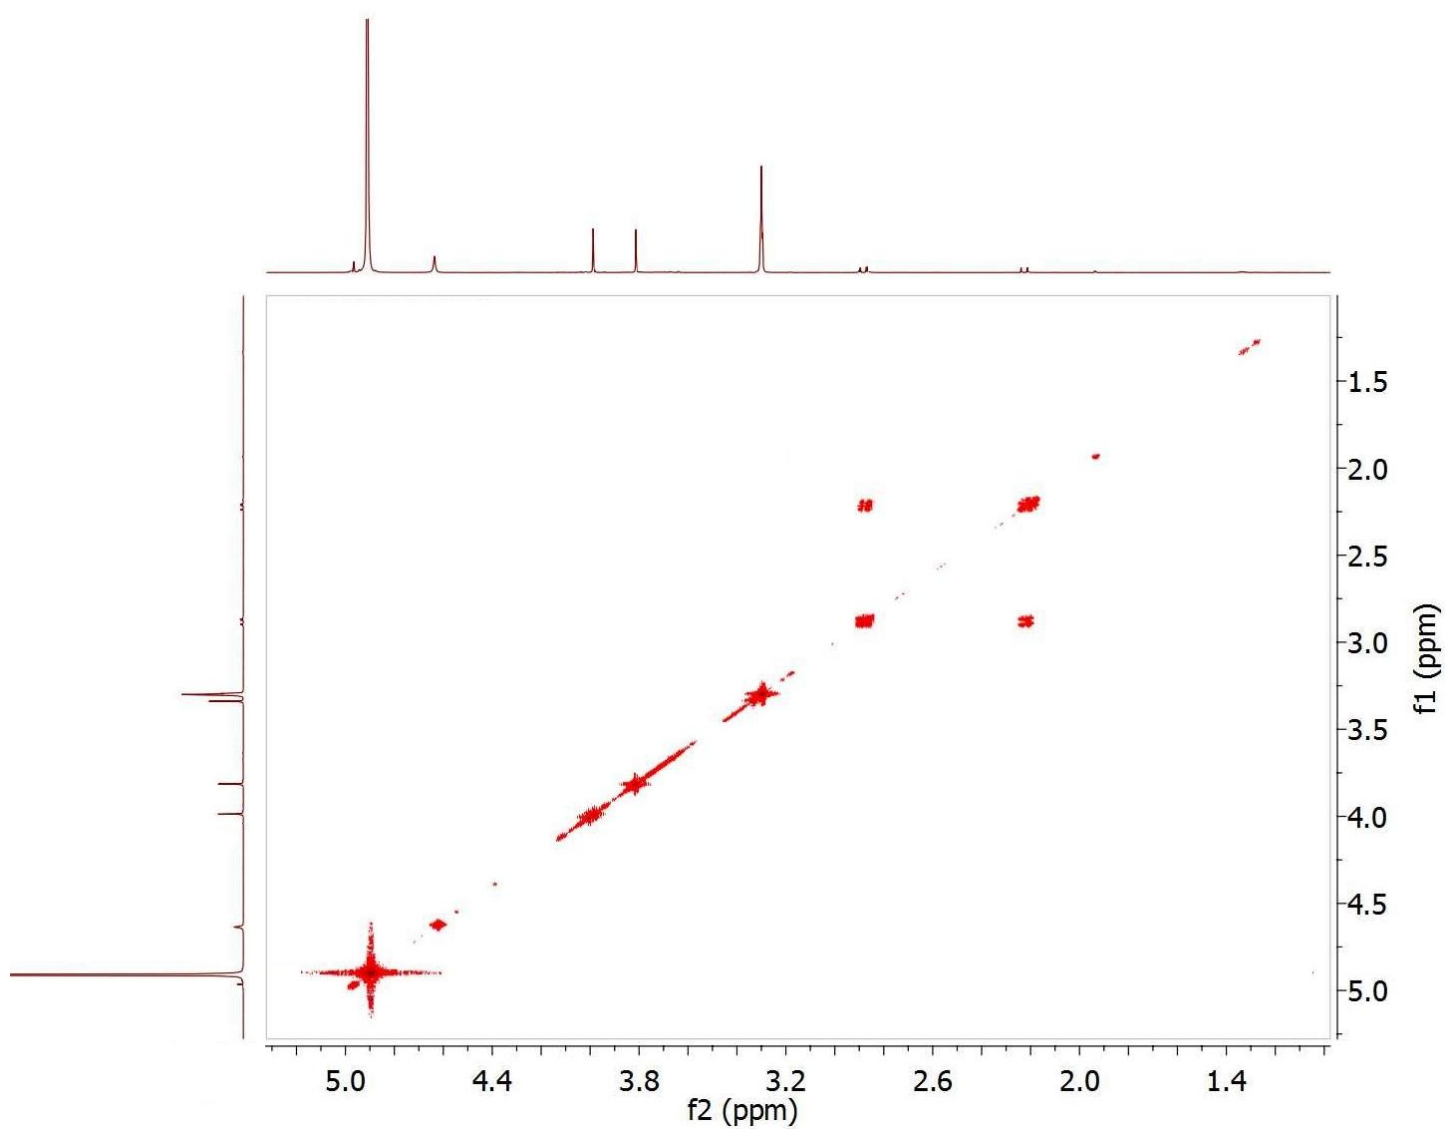

**Figure S12.** Multiplicity-edited HSQC spectrum of fusaripyridine B (**2**) (CD<sub>3</sub>OD).

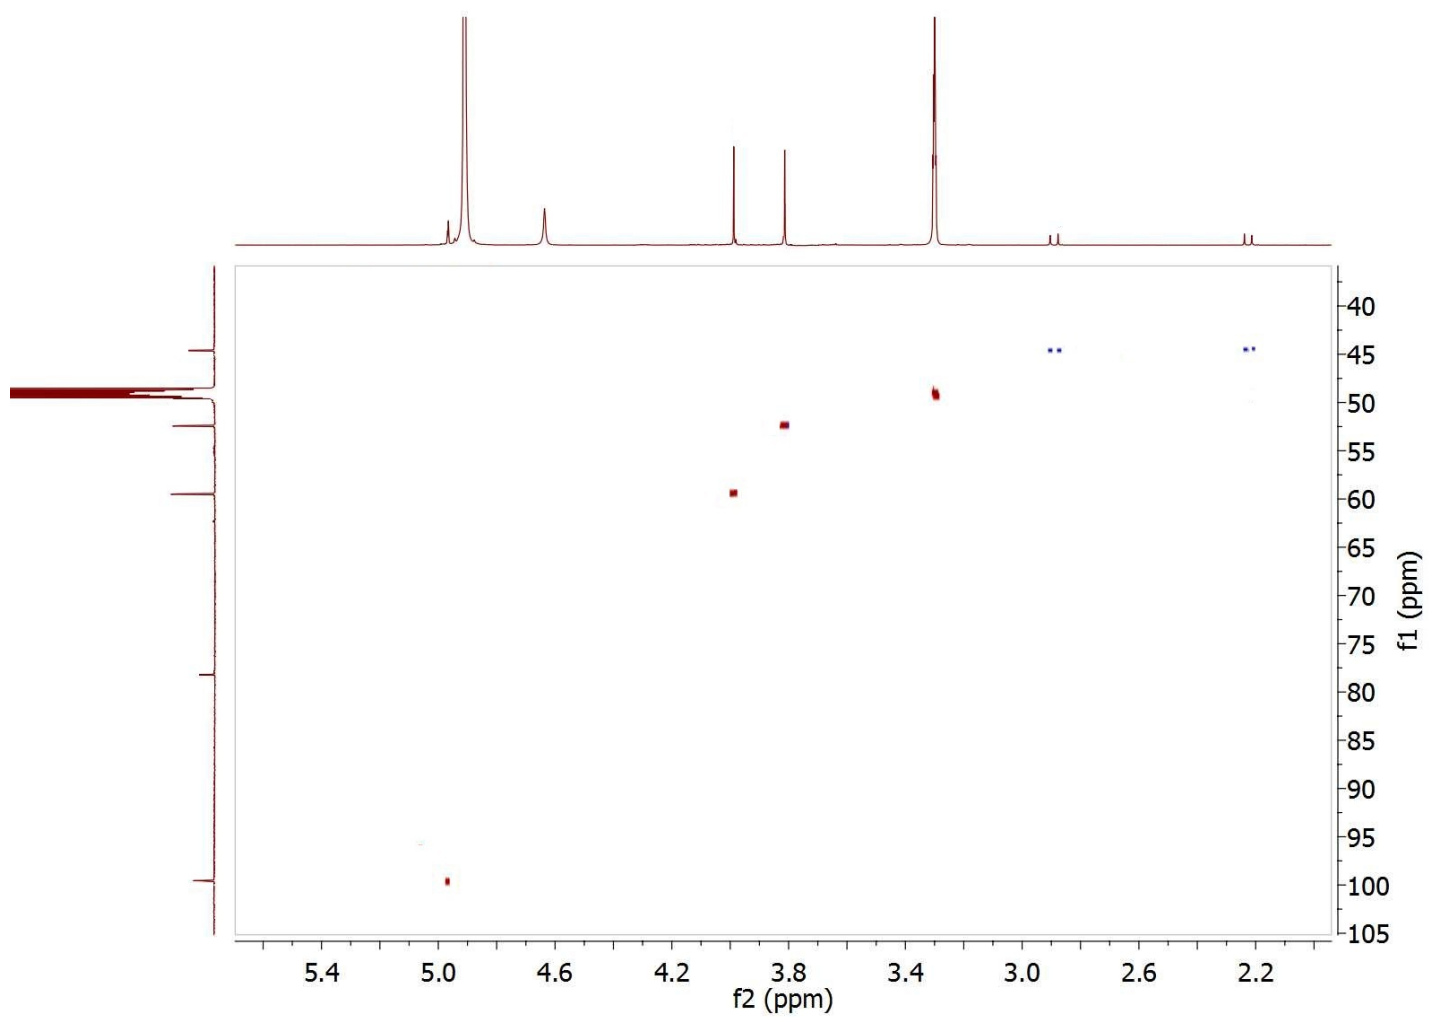

**Figure S13.**  $^1\text{H}$ - $^{13}\text{C}$  HMBC spectrum of fusaripyridine B (**2**) ( $\text{CD}_3\text{OD}$ ).

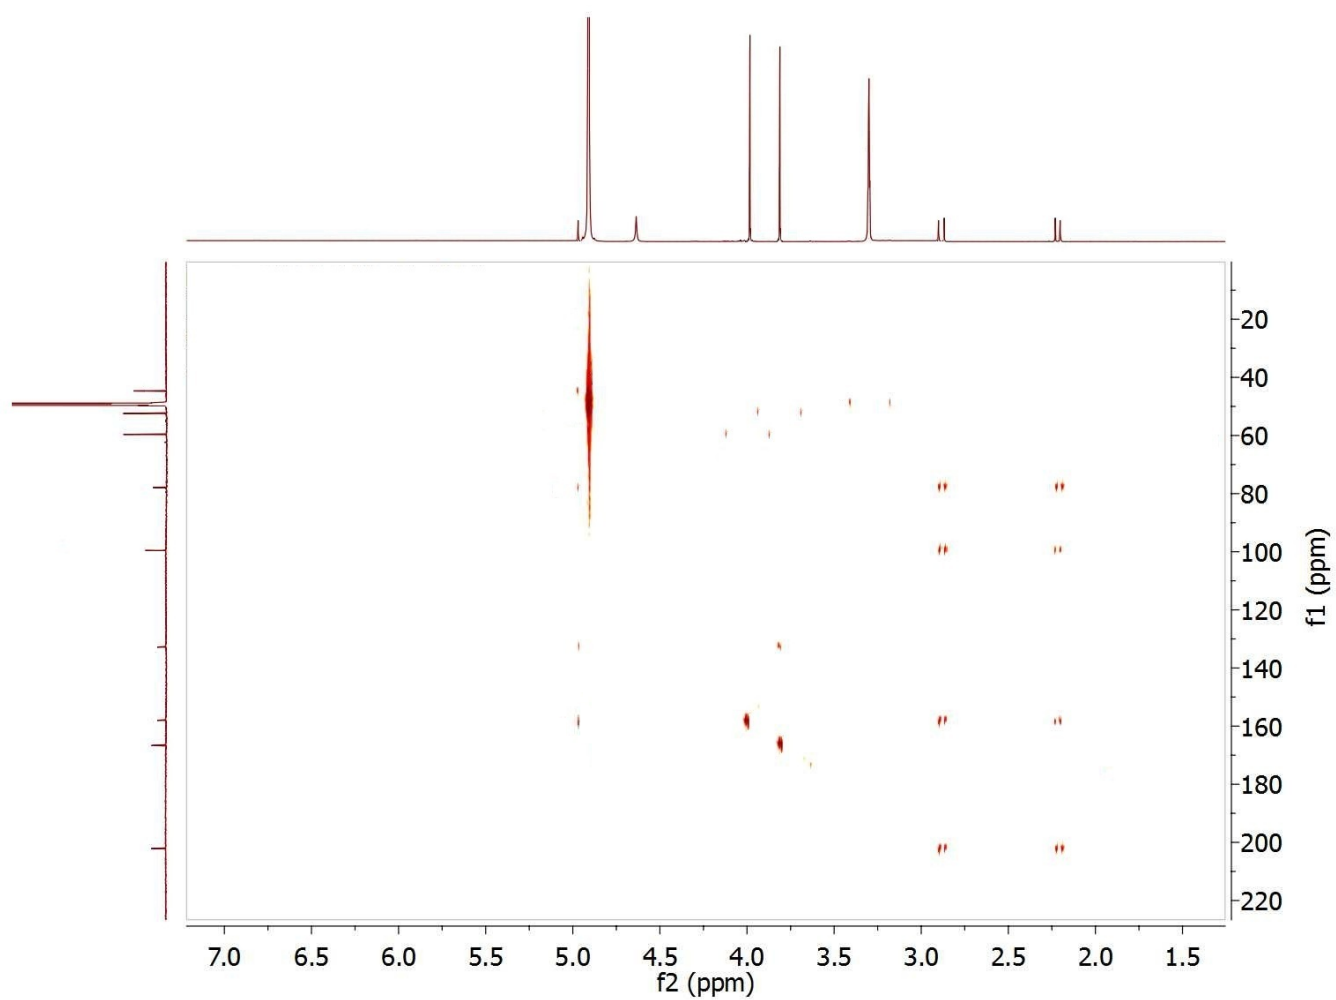

**Figure S14.**  $^1\text{H}$ - $^1\text{H}$  NOESY spectrum of fusaripyridine B (**2**) ( $\text{CD}_3\text{OD}$ ).

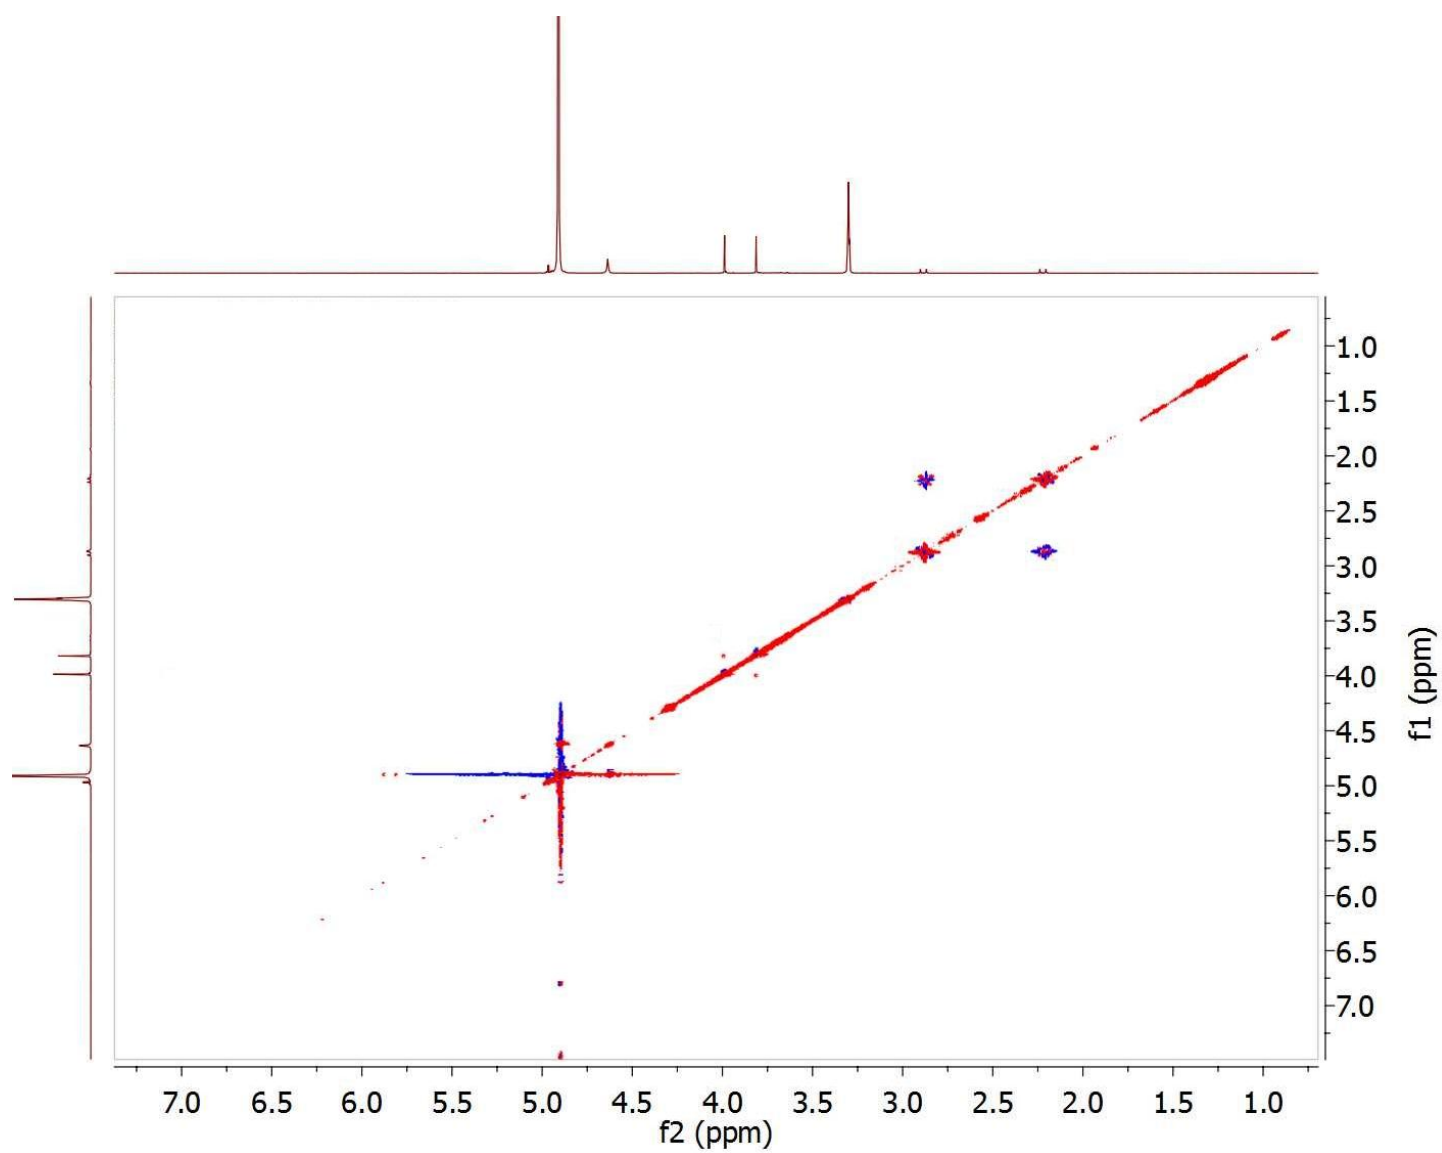

Supplement: s1 [file s1]
