# Supplementary material for: Fusaripyridines A and B; Highly Oxygenated Antimicrobial Alkaloid Dimers Featuring an Unprecedented 1,4-Bis(2-hydroxy-1,2-dihydropyridin-2-yl)butane-2,3-dione Core from the Marine Fungus Fusarium sp. LY019
Source: MDPI journal article supplement (doi:10.3390/md19090505), 2021-09-06
Supplement: s1 [file s1]

| Row | Highlight Display Tag |      |    | Symbol | X          | Y          | Z          |
|-----|-----------------------|------|----|--------|------------|------------|------------|
| 1   | No                    | Show | 1  | C      | -4.4275540 | -0.2896130 | 1.6774850  |
| 2   | No                    | Show | 2  | O      | -3.4886400 | 0.7560300  | 1.2313120  |
| 3   | No                    | Show | 3  | C      | -2.7318990 | 0.3565790  | 0.0883520  |
| 4   | No                    | Show | 4  | C      | -2.8608580 | -0.8053520 | -0.6084040 |
| 5   | No                    | Show | 5  | C      | -1.9125980 | -1.2088560 | -1.7642360 |
| 6   | No                    | Show | 6  | O      | -2.5139280 | -1.0866120 | -3.0818940 |
| 7   | No                    | Show | 7  | C      | -1.3615060 | -2.6952970 | -1.5030740 |
| 8   | No                    | Show | 8  | C      | -0.7983120 | -2.8597160 | -0.0511160 |
| 9   | No                    | Show | 9  | O      | -1.5125030 | -2.9819440 | 0.9751680  |
| 10  | No                    | Show | 10 | C      | 0.7956390  | -2.8586710 | 0.0511600  |
| 11  | No                    | Show | 11 | O      | 1.5101870  | -2.9790110 | -0.9751000 |
| 12  | No                    | Show | 12 | C      | 1.3584770  | -2.6950660 | 1.5033100  |
| 13  | No                    | Show | 13 | C      | 1.9112960  | -1.2093530 | 1.7648580  |
| 14  | No                    | Show | 14 | O      | 2.5127090  | -1.0882400 | 3.0826610  |
| 15  | No                    | Show | 15 | C      | 2.8602980  | -0.8069550 | 0.6092690  |
| 16  | No                    | Show | 16 | C      | 2.7323440  | 0.3547120  | -0.0881530 |
| 17  | No                    | Show | 17 | O      | 3.4899110  | 0.7530960  | -1.2309290 |
| 18  | No                    | Show | 18 | C      | 4.4278630  | -0.2936830 | -1.6764650 |
| 19  | No                    | Show | 19 | C      | 1.7539290  | 1.4067100  | 0.3514490  |
| 20  | No                    | Show | 20 | O      | 1.5375050  | 2.6543950  | -0.3734820 |
| 21  | No                    | Show | 21 | C      | 2.8009040  | 3.3917750  | -0.6354630 |
| 22  | No                    | Show | 22 | C      | 0.8695740  | 1.1044900  | 1.3564890  |
| 23  | No                    | Show | 23 | O      | 0.0226760  | 1.9286000  | 2.1071280  |
| 24  | No                    | Show | 24 | N      | 0.6360110  | -0.2998160 | 1.7485470  |
| 25  | No                    | Show | 25 | O      | 0.1541570  | -0.2552410 | 3.1564940  |
| 26  | No                    | Show | 26 | N      | -0.6360770 | -0.3008900 | -1.7479950 |
| 27  | No                    | Show | 27 | O      | -0.1546750 | -0.2571130 | -3.1561580 |
| 28  | No                    | Show | 28 | C      | -0.8685730 | 1.1039660  | -1.3568080 |
| 29  | No                    | Show | 29 | O      | -0.0210300 | 1.9270160  | -2.1078800 |
| 30  | No                    | Show | 30 | C      | -1.7526820 | 1.4075280  | -0.3520110 |

|    |    |      |    |   |            |            |            |
|----|----|------|----|---|------------|------------|------------|
| 31 | No | Show | 31 | O | -1.5352440 | 2.6556110  | 0.3720270  |
| 32 | No | Show | 32 | C | -2.7981920 | 3.3939760  | 0.6336560  |
| 33 | No | Show | 33 | H | -3.9021550 | -1.2395600 | 1.9073460  |
| 34 | No | Show | 34 | H | -4.8950280 | 0.1051270  | 2.5991340  |
| 35 | No | Show | 35 | H | -5.2182270 | -0.4864190 | 0.9237110  |
| 36 | No | Show | 36 | H | -3.6262080 | -1.5432680 | -0.3569660 |
| 37 | No | Show | 37 | H | -1.6420210 | -0.7502650 | -3.5697370 |
| 38 | No | Show | 38 | H | -2.1968870 | -3.3986410 | -1.6651740 |
| 39 | No | Show | 39 | H | -0.5491900 | -2.9095680 | -2.2189180 |
| 40 | No | Show | 40 | H | 2.1931060  | -3.3992760 | 1.6655390  |
| 41 | No | Show | 41 | H | 0.5457690  | -2.9087030 | 2.2189170  |
| 42 | No | Show | 42 | H | 1.6414610  | -0.7503510 | 3.5705080  |
| 43 | No | Show | 43 | H | 3.6253760  | -1.5454360 | 0.3586650  |
| 44 | No | Show | 44 | H | 5.2183390  | -0.4907960 | -0.9225630 |
| 45 | No | Show | 45 | H | 3.9015660  | -1.2432660 | -1.9057850 |
| 46 | No | Show | 46 | H | 4.8957400  | 0.1001070  | -2.5983150 |
| 47 | No | Show | 47 | H | 3.5375850  | 2.6975090  | -1.0929710 |
| 48 | No | Show | 48 | H | 2.5444620  | 4.2175920  | -1.3247140 |
| 49 | No | Show | 49 | H | 3.1931780  | 3.8022000  | 0.3160540  |
| 50 | No | Show | 50 | H | -0.7215020 | 2.3371320  | 1.4194140  |
| 51 | No | Show | 51 | H | -0.1349940 | 0.7784810  | 3.0823210  |
| 52 | No | Show | 52 | H | 0.1354420  | 0.7764130  | -3.0824230 |
| 53 | No | Show | 53 | H | 0.7234040  | 2.3356400  | -1.4204210 |
| 54 | No | Show | 54 | H | -3.1902000 | 3.8041460  | -0.3180760 |
| 55 | No | Show | 55 | H | -2.5411650 | 4.2199870  | 1.3224520  |
| 56 | No | Show | 56 | H | -3.5352820 | 2.7004150  | 1.0915730  |

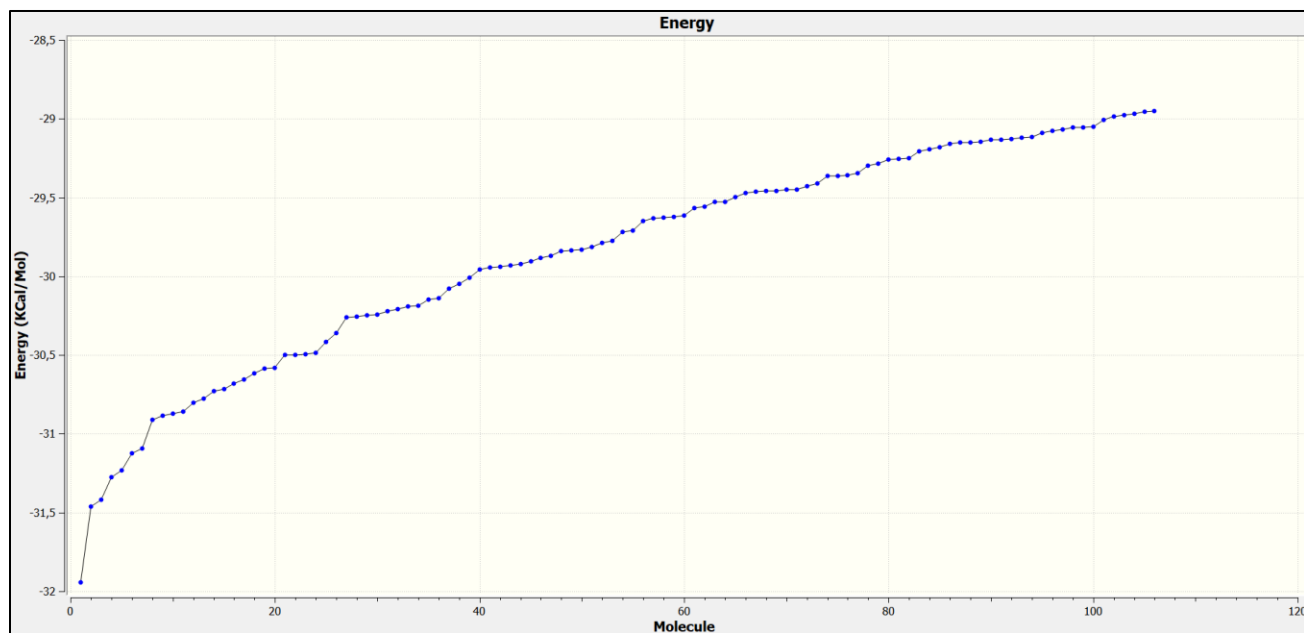

The GMMX plugin for the conformational analysis at a  $0.5 \text{ kcal.mol}^{-1}$  cutoff was used to select only the most stable conformer (cf image).
